# Supplementary material for: The Pan-Cancer Multi-Omics Landscape of FOXO Family Relevant to Clinical Outcome and Drug Resistance
Source: MDPI journal article supplement (doi:10.3390/ijms232415647), 2022-12-09
Supplement: s1 [file s1]

## Supplementary Materials:

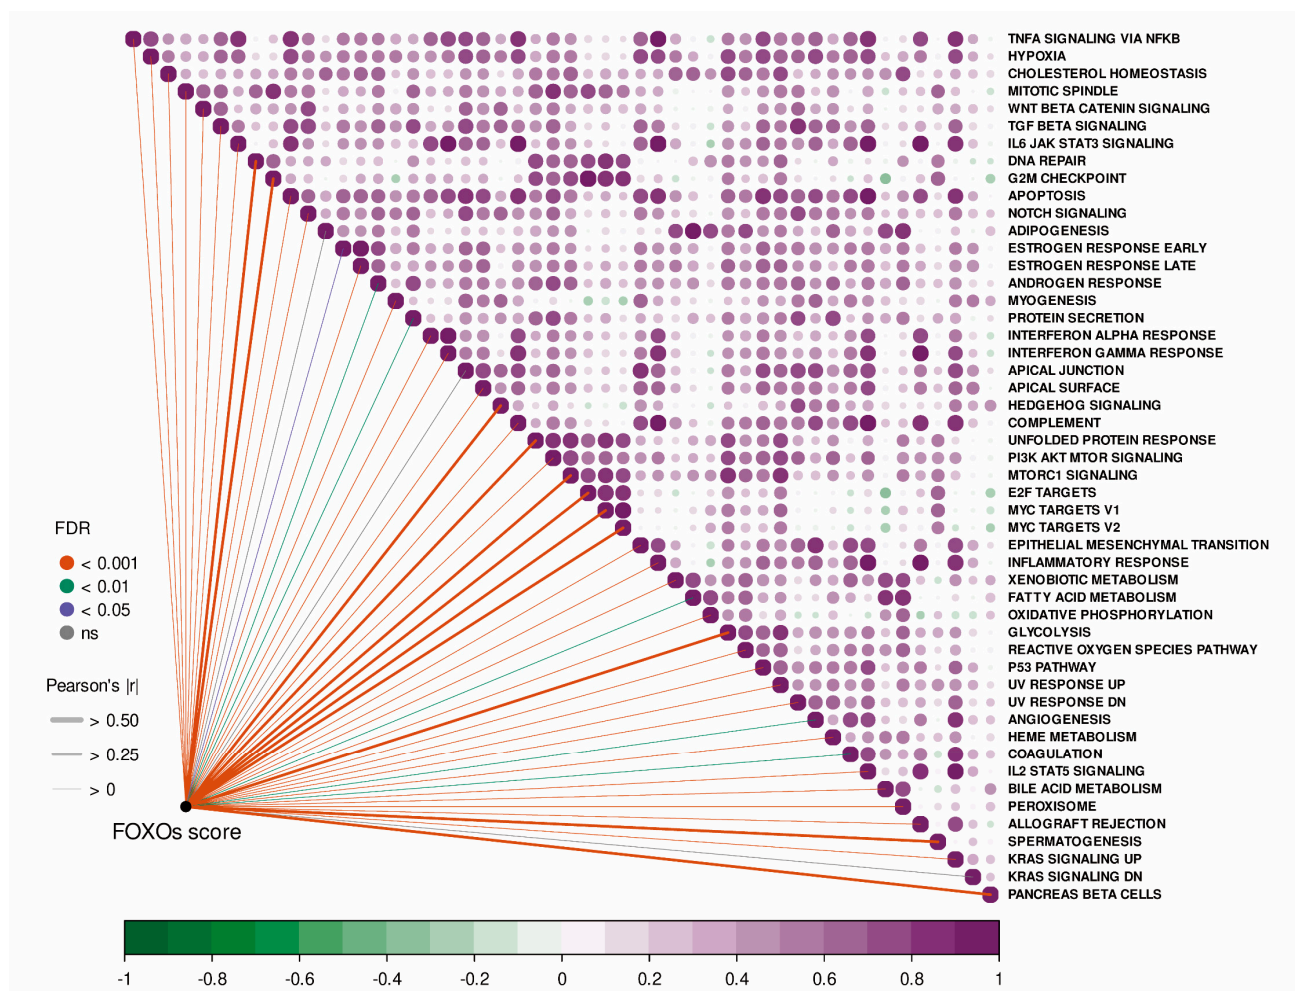

**Supplementary Figure S1.** The general correlations between FOXOs score and hallmark pathways in the TCGA pan-cancer cohort (FDR, false discovery rate).

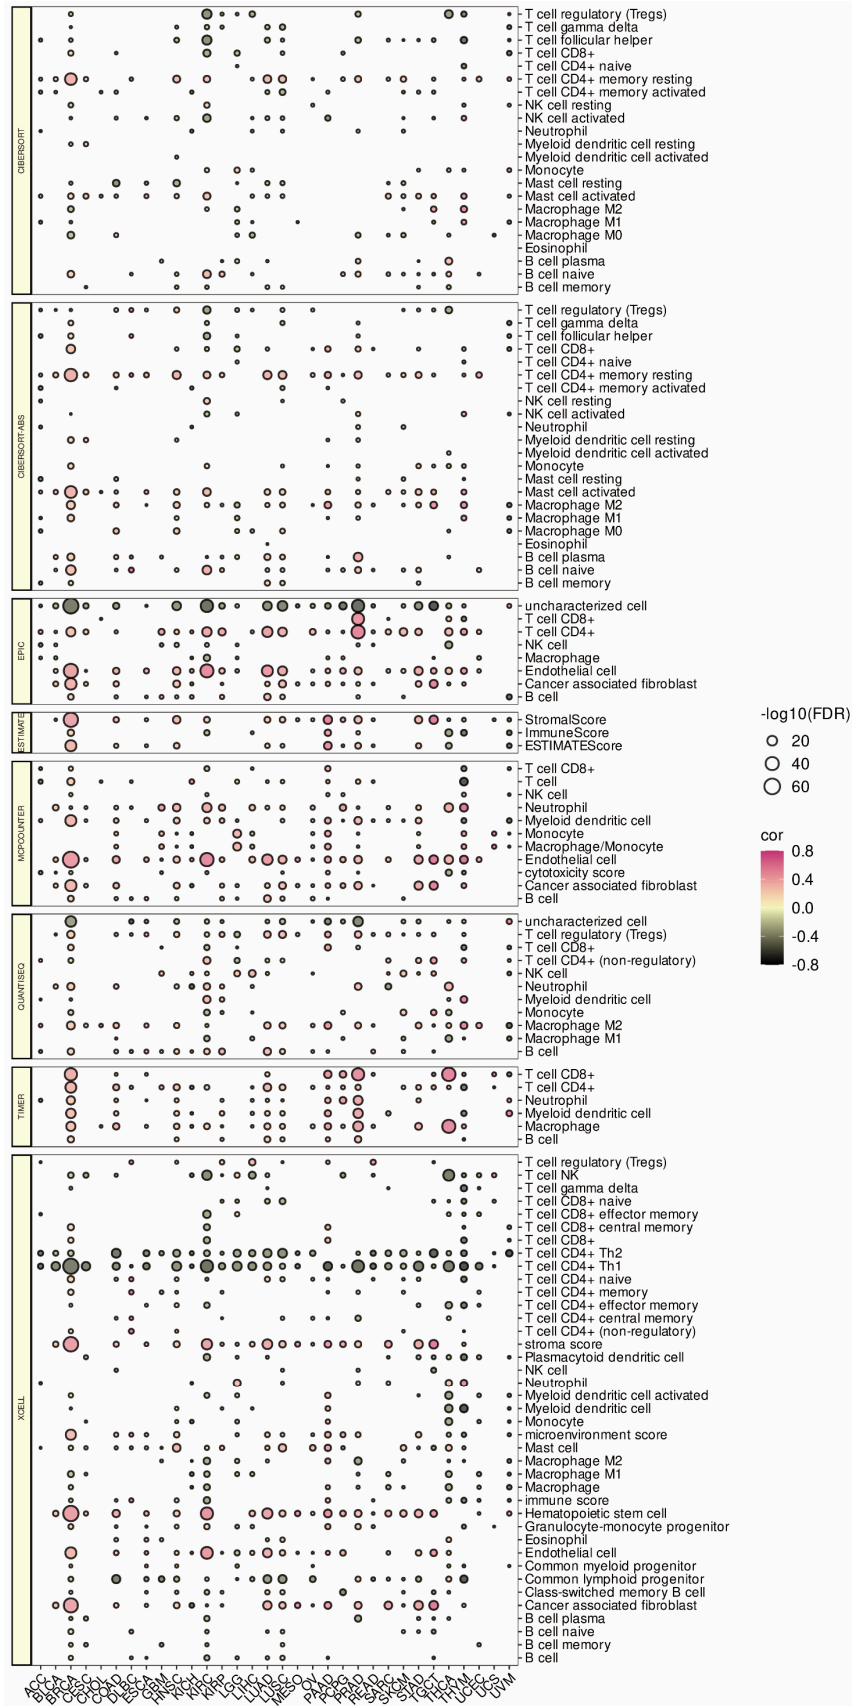

**Supplementary Figure S2.** Bubble plot of the correlations between FOXOs score and tumor microenvironment scores calculated by different algorithms in each tumor type (FDR, false discovery rate).
